# Supplementary material for: Cynaroside Induces G1 Cell Cycle Arrest by Downregulating Cell Division Cycle 25A in Colorectal Cancer
Source: MDPI journal article supplement (doi:10.3390/molecules29071508), 2024-03-28
Supplement: s1 [file s1]

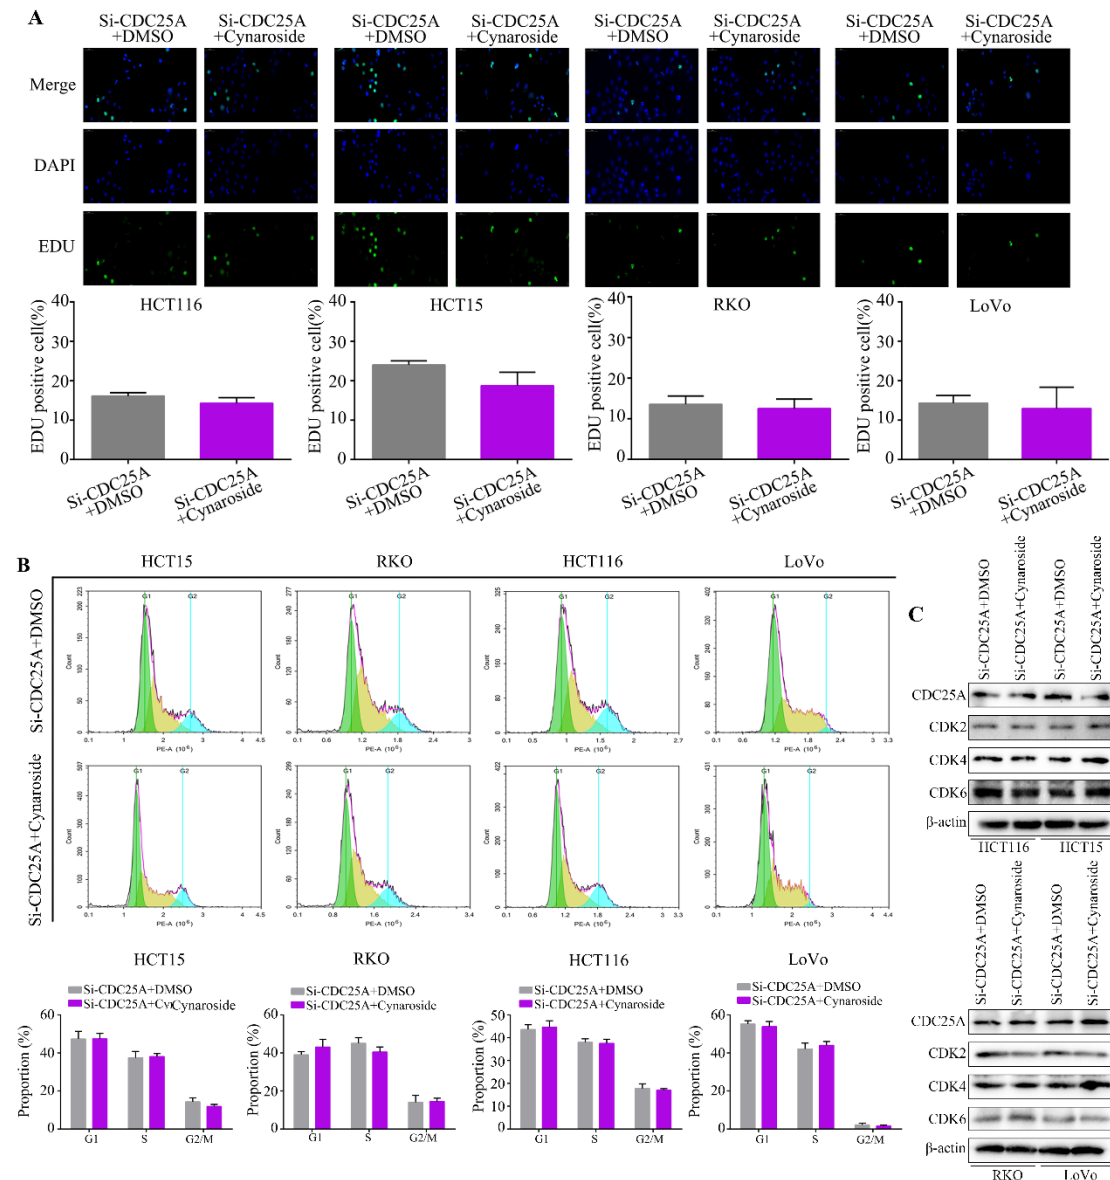

**Figure S1.** Knockdown of CDC25A recedes the G1/S-phase blocking effect of cynaroside on CRC cells. CRC cells were treated with CDC25A small interfering RNA+ DMSO and CDC25A small interfering RNA + cynaroside. (A) EDU assays were performed to determine the DNA replication rate of CRC cells in each group. (B) Flow cytometry was performed to determine the distribution of CRC cells in each group. (C) Western blot was used to detect the expression of CDC25A, CDK4, CDK6, and CDK2 in each group of CRC cells.  $n = 3$ . The control group was used for comparison. Data are shown as mean  $\pm$  SD.
